# Supplementary material for: A Cross-Sectional Survey on the Malaria Control and Prevention Knowledge, Attitudes, and Practices of Caregivers of Children Under-5 in the Western Area of Sierra Leone
Source: MDPI journal article supplement (doi:10.3390/tropicalmed7070120), 2022-06-28
Supplement: s1 [file s1]

**Table S2** Comparison of attitudes towards malaria between caregivers living in rural and urban districts

| Variables                                                     | Total<br>(n, %) | Districts (n, %) |            | P                           |
|---------------------------------------------------------------|-----------------|------------------|------------|-----------------------------|
|                                                               |                 | Urban(173)       | Rural(177) |                             |
| <b>Do you think malaria is a very serious health problem?</b> |                 |                  |            | <b>0.500<sup>a</sup></b>    |
| Yes                                                           | 315(90.0)       | 160 (92.5)       | 155(87.6)  |                             |
| No                                                            | 11(3.1)         | 4 (2.3)          | 7(4.0)     |                             |
| Not sure                                                      | 19(5.4)         | 7 (4.0)          | 12(6.8)    |                             |
| Don't know                                                    | 5(1.4)          | 2 (1.2)          | 3(1.7)     |                             |
| <b>Do you and your child(ren) sleep under a bed net?</b>      |                 |                  |            | <b>0.000<sup>a***</sup></b> |
| Yes                                                           | 272(77.7)       | 121 (69.9)       | 151(85.3)  |                             |
| No                                                            | 78(22.3)        | 52 (30.1)        | 26(14.7)   |                             |
| <b>If Yes (Response rate: 77.7%), is the bed net:</b>         |                 |                  |            | <b>0.883<sup>b</sup></b>    |
| Treated                                                       | 213(78.3)       | 94 (77.7)        | 119(78.8)  |                             |
| Not treated                                                   | 59(21.7)        | 27 (22.3)        | 32(21.2)   |                             |
| <b>How often do you and your child(ren) use the bed net?</b>  |                 |                  |            | <b>0.204<sup>b</sup></b>    |
| Always                                                        | 233(85.7)       | 100 (82.6)       | 133(88.1)  |                             |
| Sometimes                                                     | 39(14.3)        | 21 (17.4)        | 18(11.9)   |                             |
| <b>If No (n = 78, 22.3%), why?</b>                            |                 |                  |            | <b>0.130<sup>a</sup></b>    |
| I can't afford it                                             | 36(46.2)        | 23 (44.2)        | 13(50.0)   |                             |
| It is not readily available                                   | 25(32.1)        | 19 (36.5)        | 6(23.1)    |                             |
| My child(ren) and I don't like sleeping under a bed net       | 5(6.4)          | 5 (9.6)          | 0 (0.0)    |                             |
| I don't think it is important                                 | 3(3.8)          | 1 (1.9)          | 2(7.7)     |                             |
| Others                                                        | 9(11.5)         | 4 (7.7)          | 5(19.2)    |                             |
| <b>At what time of day do you think mosquitoes bite most?</b> |                 |                  |            | <b>0.908<sup>a</sup></b>    |
| Daytime                                                       | 5(1.4)          | 2 (1.2)          | 3(1.7)     |                             |
| Night time                                                    | 308(88.0)       | 151 (87.3)       | 157(88.7)  |                             |
| Anytime                                                       | 30(8.6)         | 16 (9.2)         | 14(7.9)    |                             |
| Don't know                                                    | 7(2.0)          | 4 (2.3)          | 3(1.7)     |                             |
| <b>What do you think is the best treatment for malaria?</b>   |                 |                  |            | <b>0.245<sup>a</sup></b>    |
| ACTs                                                          | 228(65.1)       | 116 (67.1)       | 112 (63.3) |                             |
| Paracetamol                                                   | 2(0.6)          | 2 (1.2)          | 0 (0.0)    |                             |
| Traditional/herbal medications                                | 3(0.9)          | 1 (0.6)          | 2 (1.1)    |                             |
| Don't know                                                    | 112(32.0)       | 50 (28.9)        | 62 (35.0)  |                             |
| Others                                                        | 5(1.4)          | 4 (2.3)          | 1 (0.6)    |                             |

<sup>a</sup> Pearson Chi-square; <sup>b</sup> Fisher's Exact Test; \*  $P < 0.05$ ; \*\*  $P < 0.01$ ; \*\*\*  $P < 0.001$ ;

ACTs: Artemisinin-based Combination Therapies
