# Supplementary material for: A Cross-Sectional Survey on the Malaria Control and Prevention Knowledge, Attitudes, and Practices of Caregivers of Children Under-5 in the Western Area of Sierra Leone
Source: MDPI journal article supplement (doi:10.3390/tropicalmed7070120), 2022-06-28
Supplement: s1 [file s1]

**Scoring system to evaluate the levels of Knowledge, Attitude and Practice (KAPs) among the caregivers of children under-5. The scoring criteria are as follows:**

➤ Knowledge (9 point):

1. Know that malaria is caused by parasites through mosquito bites ([1 point](#));
2. Mention the breeding places of mosquitoes, stagnant water([1 point](#)); one of other places that suitable for mosquitoes to rest including bushes/dirty places, dark places/sheds or other fit places ([1 point](#));
3. Mention the symptom, fever ([1 point](#)); headache ([1 point](#)); three or more other common symptoms including body and joint pains, vomiting, loss of appetite, and other fit symptom ([1 point](#));
4. Malaria can be prevented ([1 point](#));
5. Malaria can be cured ([1 point](#));
6. Malaria can lead to death ([1 point](#)).

➤ Attitude (6 point):

1. Awareness of the seriousness of malaria ([1 point](#));
2. Awareness of sleeping under a bed net ([1 point](#)); thinking the bed net is treated ([1 point](#)) and would always use the bed net ([1 point](#));
3. Thinking that mosquito bites at the night time most ([1 point](#));
4. Thinking that Artemisinin-based Combination Therapies (ACTs) is the best treatment for malaria ([1 point](#)).

➤ Practice (9 point):

1. Take the measure, sleeping under insecticide-treated bed net ([2 point](#)), choose one (1 point) or more(2 point) measures including: insecticide spray, wearing protective clothing, and mosquito repellent; two or more measures including clearing bushes around the house, getting rid of stagnant water, regular clean-ups around the house and other fit measures ([1 point](#));
2. Go to clinic/hospital ([1 point](#)) within 24h ([1 point](#)) when child has fever;
3. Seeking care according the condition of child ([1 point](#));
4. Administer the full treatment course for sick child ([1 point](#)).

The level of KAPs are recorded to binary level. High/low knowledge, positive/negative attitude and good/bad practice levels were defined as scores above and below the mean score, respectively.
