# Supplementary material for: A Cross-Sectional Survey on the Malaria Control and Prevention Knowledge, Attitudes, and Practices of Caregivers of Children Under-5 in the Western Area of Sierra Leone
Source: MDPI journal article supplement (doi:10.3390/tropicalmed7070120), 2022-06-28
Supplement: s1 [file s1]

**Table S4** KAPs levels of caregivers towards malaria control/prevention based on the scoring system

| Items                  | Variables        | Knowledge |     | Attitudes |          | Practices |     |
|------------------------|------------------|-----------|-----|-----------|----------|-----------|-----|
|                        |                  | High      | Low | Positive  | Negative | Good      | Bad |
| Age (years)            | 15-20            | 42        | 26  | 54        | 14       | 30        | 38  |
|                        | 21-25            | 87        | 41  | 77        | 51       | 53        | 75  |
|                        | 26-30            | 70        | 25  | 76        | 19       | 42        | 53  |
|                        | > 30             | 49        | 10  | 45        | 14       | 26        | 33  |
| Gender                 | Male             | 10        | 0   | 5         | 5        | 1         | 9   |
|                        | Female           | 238       | 102 | 247       | 93       | 150       | 190 |
| Religion               | Christian        | 90        | 21  | 87        | 24       | 42        | 69  |
|                        | Muslim           | 158       | 81  | 165       | 74       | 109       | 130 |
| Relationship           | Mother           | 225       | 99  | 238       | 86       | 145       | 179 |
|                        | Father           | 10        | 0   | 5         | 5        | 1         | 9   |
|                        | Others1          | 13        | 3   | 9         | 7        | 5         | 11  |
| Children under-5       | = 1              | 154       | 64  | 156       | 62       | 86        | 132 |
|                        | ≥ 2              | 94        | 38  | 96        | 36       | 65        | 67  |
| Other children above-5 | = 0              | 116       | 43  | 113       | 46       | 66        | 93  |
|                        | ≥ 1              | 132       | 59  | 139       | 52       | 85        | 106 |
| District               | Urban            | 120       | 53  | 114       | 59       | 70        | 103 |
|                        | Rural            | 128       | 49  | 138       | 39       | 81        | 96  |
| Marital status         | Single           | 52        | 16  | 49        | 19       | 32        | 36  |
|                        | Married          | 170       | 75  | 179       | 66       | 107       | 138 |
|                        | Consensual union | 26        | 11  | 24        | 13       | 12        | 25  |
| Education              | None             | 58        | 37  | 61        | 34       | 47        | 48  |
|                        | Primary2         | 19        | 11  | 24        | 6        | 12        | 18  |
|                        | Secondary3       | 149       | 49  | 143       | 55       | 81        | 117 |
|                        | University       | 22        | 5   | 24        | 3        | 11        | 16  |
| Occupational status    | Unemployed       | 105       | 57  | 118       | 44       | 72        | 90  |
|                        | Employed         | 115       | 40  | 112       | 43       | 74        | 81  |
|                        | Student          | 28        | 5   | 22        | 11       | 5         | 28  |
