# Supplementary material for: A Cross-Sectional Survey on the Malaria Control and Prevention Knowledge, Attitudes, and Practices of Caregivers of Children Under-5 in the Western Area of Sierra Leone
Source: MDPI journal article supplement (doi:10.3390/tropicalmed7070120), 2022-06-28
Supplement: s1 [file s1]

**Table S3** Comparison of practices towards malaria between caregivers living in rural and urban districts

| Variables                                                                              | Total<br>(n, %) | Districts (n, %) |            | P                     |
|----------------------------------------------------------------------------------------|-----------------|------------------|------------|-----------------------|
|                                                                                        |                 | Urban(173)       | Rural(177) |                       |
| Protective measures against mosquito bites <sup>‡</sup>                                |                 |                  |            |                       |
| Sleeping under an ITN                                                                  | 214(61.1)       | 90(52.0)         | 124(70.1)  | 0.001***              |
| Mosquito repellent                                                                     | 143(40.9)       | 76(43.9)         | 67(37.9)   | 0.248                 |
| Regular clean-ups around the house                                                     | 111(31.7)       | 51(29.5)         | 60(34.0)   | 0.374                 |
| Wearing protective clothing                                                            | 88(25.1)        | 46(26.6)         | 42(23.7)   | 0.537                 |
| Insecticide spray                                                                      | 87(24.9)        | 45(26.0)         | 42(23.7)   | 0.621                 |
| Getting rid of stagnant water                                                          | 29(8.3)         | 12(6.9)          | 17(10.0)   | 0.365                 |
| Clearing bushes around the house                                                       | 12(3.4)         | 11(6.4)          | 1(0.6)     | 0.003**               |
| Others                                                                                 | 21(6.0)         | 8(4.6)           | 13(7.3)    | 0.284                 |
| What is the first thing you do when your child(ren) has fever?                         |                 |                  |            | 0.640 <sup>a</sup>    |
| Go to clinic/hospital                                                                  | 270(77.1)       | 130(75.1)        | 140(79.1)  |                       |
| Go to Pharmacy                                                                         | 12(3.4)         | 7(4.0)           | 5(2.8)     |                       |
| Home treatment/self-medication                                                         | 68(19.4)        | 36(20.8)         | 32(18.1)   |                       |
| What determines/influences your action to seek care if your child(ren) has fever?      |                 |                  |            | 0.838 <sup>a</sup>    |
| Condition of the child                                                                 | 327(93.4)       | 160(92.5)        | 167(94.4)  |                       |
| Cost involved                                                                          | 13(3.7)         | 7(4.0)           | 6(3.4)     |                       |
| Time availability                                                                      | 6(1.7)          | 4(2.3)           | 2(1.1)     |                       |
| Others                                                                                 | 4(1.1)          | 2(1.2)           | 2(1.1)     |                       |
| What do you do when an antimalarial medication is prescribed for your sick child(ren)? |                 |                  |            | 0.000 <sup>a***</sup> |
| Administer the full treatment course                                                   | 250(71.4)       | 138(79.8)        | 112(63.3)  |                       |
| Stop administration as soon as child begins to show improvement                        | 45(12.9)        | 22(12.7)         | 23(13.0)   |                       |
| Administer to other siblings who are sick/not sick with malaria                        | 7(2.0)          | 4(2.3)           | 3(1.7)     |                       |
| Others                                                                                 | 48(13.7)        | 9(5.2)           | 39(22.0)   |                       |
| How long do you wait before seeking medical help, if your child has fever?             |                 |                  |            | 0.130 <sup>a</sup>    |
| Within 24h                                                                             | 191(54.6)       | 86(49.7)         | 105(59.3)  |                       |
| 2-5 days                                                                               | 158(45.1)       | 86(49.7)         | 72(40.7)   |                       |
| Others                                                                                 | 1(0.3)          | 1(0.6)           | 0(0.0)     |                       |

<sup>‡</sup> Multiple responses; <sup>a</sup> Pearson Chi-square; <sup>b</sup> Fisher's Exact Test; \*  $p < 0.05$ ; \*\*  $p < 0.01$ ; \*\*\*  $p < 0.001$

ITN: Insecticides Treated Nets
