# Supplementary material for: A Cross-Sectional Survey on the Malaria Control and Prevention Knowledge, Attitudes, and Practices of Caregivers of Children Under-5 in the Western Area of Sierra Leone
Source: MDPI journal article supplement (doi:10.3390/tropicalmed7070120), 2022-06-28
Supplement: s1 [file s1]

**Table S1** Comparison of knowledge towards malaria between caregivers living in rural and urban districts

| Variables                                                                        | Total<br>(n, %) | Districts (n, %) |            | P                        |
|----------------------------------------------------------------------------------|-----------------|------------------|------------|--------------------------|
|                                                                                  |                 | Urban(173)       | Rural(177) |                          |
| <b>Ever heard of malaria?</b>                                                    |                 |                  |            | <b>0.620<sup>b</sup></b> |
| Yes                                                                              | 347(99.1)       | 171(98.8)        | 176(99.4)  |                          |
| No                                                                               | 3(0.9)          | 2(1.2)           | 1(0.6)     |                          |
| <b>Source(s) of information about malaria<sup>ψ</sup> (Response rate: 99.1%)</b> |                 |                  |            | <b>0.858<sup>a</sup></b> |
| Television                                                                       | 61(17.4)        | 35(20.2)         | 26(14.7)   | <b>0.172</b>             |
| Internet/social media                                                            | 5(1.4)          | 3(1.7)           | 2(1.1)     | <b>0.682</b>             |
| Radio                                                                            | 211(60.3)       | 106(61.3)        | 105(59.3)  | <b>0.634</b>             |
| Health workers/facilities                                                        | 309(88.3)       | 149(86.1)        | 160(90.4)  | <b>0.214</b>             |
| Printed materials (billboards/handbills, etc)                                    | 28(8.0)         | 14(8.1)          | 14(7.9)    | <b>0.950</b>             |
| Others                                                                           | 93(26.6)        | 46(26.6)         | 47(26.6)   | <b>0.994</b>             |
| <b>What causes malaria?</b>                                                      |                 |                  |            | <b>0.592<sup>a</sup></b> |
| Parasite through mosquito bite                                                   | 317(90.6)       | 157(90.8)        | 160(90.4)  |                          |
| Eating too much                                                                  | 1(0.3)          | 1(0.6)           | 0(0.0)     |                          |
| Close contact with a person who has malaria                                      | 1(0.3)          | 0(0.0)           | 1(0.6)     |                          |
| Don't know                                                                       | 17(4.9)         | 7(4.0)           | 10(5.6)    |                          |
| Others                                                                           | 14(4.0)         | 8(4.6)           | 6(3.4)     |                          |
| <b>Resting/breeding places of mosquitoes<sup>ψ</sup></b>                         |                 |                  |            | <b>0.332<sup>a</sup></b> |
| Stagnant water                                                                   | 179(51.1)       | 84(48.6)         | 95(53.7)   | <b>0.338</b>             |
| Bushes/dirty places                                                              | 303(86.6)       | 152(87.9)        | 159(89.8)  | <b>0.484</b>             |
| Dark places/sheds                                                                | 41(11.7)        | 21(12.1)         | 20(11.3)   | <b>0.807</b>             |
| Don't know                                                                       | 28(8.0)         | 11(6.4)          | 17(9.6)    | <b>0.263</b>             |
| Others                                                                           | 9(2.6)          | 7(4.0)           | 2(1.1)     | <b>0.102</b>             |
| <b>Signs &amp; symptoms of malaria<sup>ψ</sup></b>                               |                 |                  |            | <b>0.094<sup>a</sup></b> |
| Fever                                                                            | 251(71.7)       | 120(69.4)        | 131(74.0)  | <b>0.334</b>             |
| Headache                                                                         | 32(9.1)         | 12(6.9)          | 20(11.3)   | <b>0.157</b>             |
| Body & joint pains                                                               | 94(26.9)        | 40(23.1)         | 54(30.5)   | <b>0.119</b>             |
| Vomiting                                                                         | 150(42.9)       | 82(47.4)         | 68(38.4)   | <b>0.09</b>              |
| Loss of appetite                                                                 | 108(30.9)       | 50(28.9)         | 58(32.8)   | <b>0.434</b>             |
| Don't know                                                                       | 9(2.6)          | 2(1.2)           | 7(4.0)     | <b>0.174</b>             |
| Others                                                                           | 205(58.6)       | 112(64.7)        | 93(52.5)   | <b>0.020<sup>*</sup></b> |
| <b>Can malaria be prevented?</b>                                                 |                 |                  |            | <b>0.077<sup>a</sup></b> |
| Yes                                                                              | 287(82.0)       | 150(86.7)        | 137(77.4)  |                          |
| No                                                                               | 8(2.3)          | 3(1.7)           | 5(2.8)     |                          |
| Don't know                                                                       | 55(15.7)        | 20(11.6)         | 35(19.8)   |                          |
| <b>Can malaria be cured?</b>                                                     |                 |                  |            | <b>0.050<sup>b</sup></b> |
| Yes                                                                              | 338(96.6)       | 171(98.8)        | 167(94.4)  |                          |
| No                                                                               | 4(1.1)          | 0(0.0)           | 4(2.3)     |                          |
| Don't know                                                                       | 8(2.3)          | 2(1.2)           | 6(3.4)     |                          |
| <b>Can malaria lead to death?</b>                                                |                 |                  |            | <b>0.947<sup>a</sup></b> |
| Yes                                                                              | 319(91.1)       | 157(90.8)        | 162(91.5)  |                          |
| No                                                                               | 13(3.7)         | 7(4.0)           | 6(3.4)     |                          |
| Don't know                                                                       | 18(5.1)         | 9(5.2)           | 9(5.1)     |                          |

<sup>ψ</sup> Multiple responses; <sup>a</sup> Pearson Chi-square; <sup>b</sup> Fisher's Exact Test; \*  $P < 0.05$ ; \*\*  $P < 0.01$ ; \*\*\*  $P < 0.001$
