# Supplementary material for: A Cross-Sectional Survey on the Malaria Control and Prevention Knowledge, Attitudes, and Practices of Caregivers of Children Under-5 in the Western Area of Sierra Leone
Source: MDPI journal article supplement (doi:10.3390/tropicalmed7070120), 2022-06-28
Supplement: s1 [file s1]

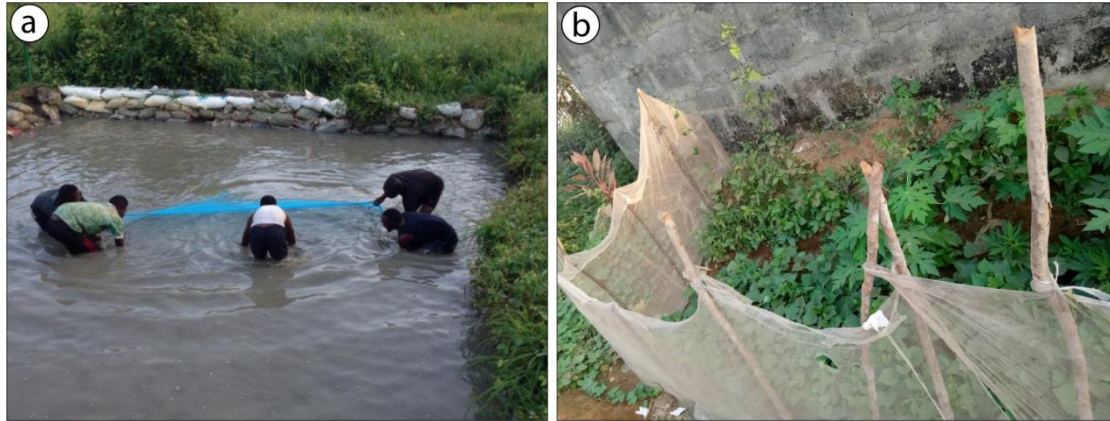

**Figure S1** Images of mosquito bed net misuse in Sierra Leone. **(a)**: Some individuals were doing pond fishing using mosquito bed nets. **(b)**: Small backyard gardens were covered with mosquito bed nets. Misuse of the bed nets like these is common especially in rural and provincial areas of Sierra Leone.
